# Supplementary material for: Haploid yeast cells undergo a reversible phenotypic switch associated with chromosome II copy number
Source: PubMed Central journal article supplement (PMC5249023; doi:10.1186/s12863-016-0464-4), 2016-12-22

**a**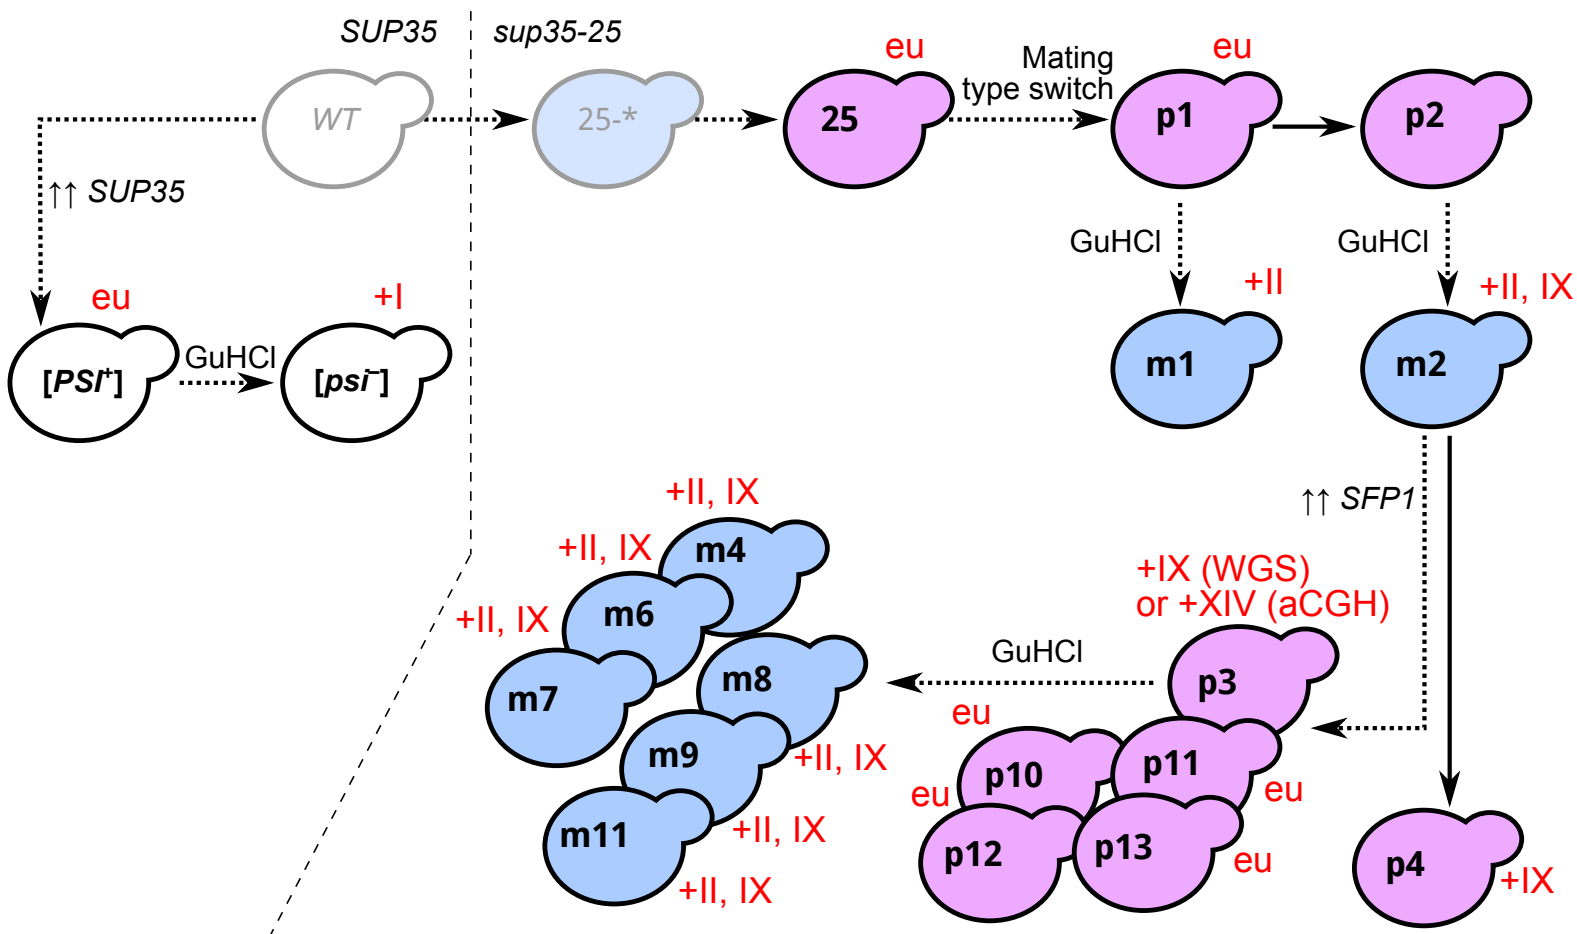

b

# CLAC Plot for Sample: [PSI\*] vs PSL2

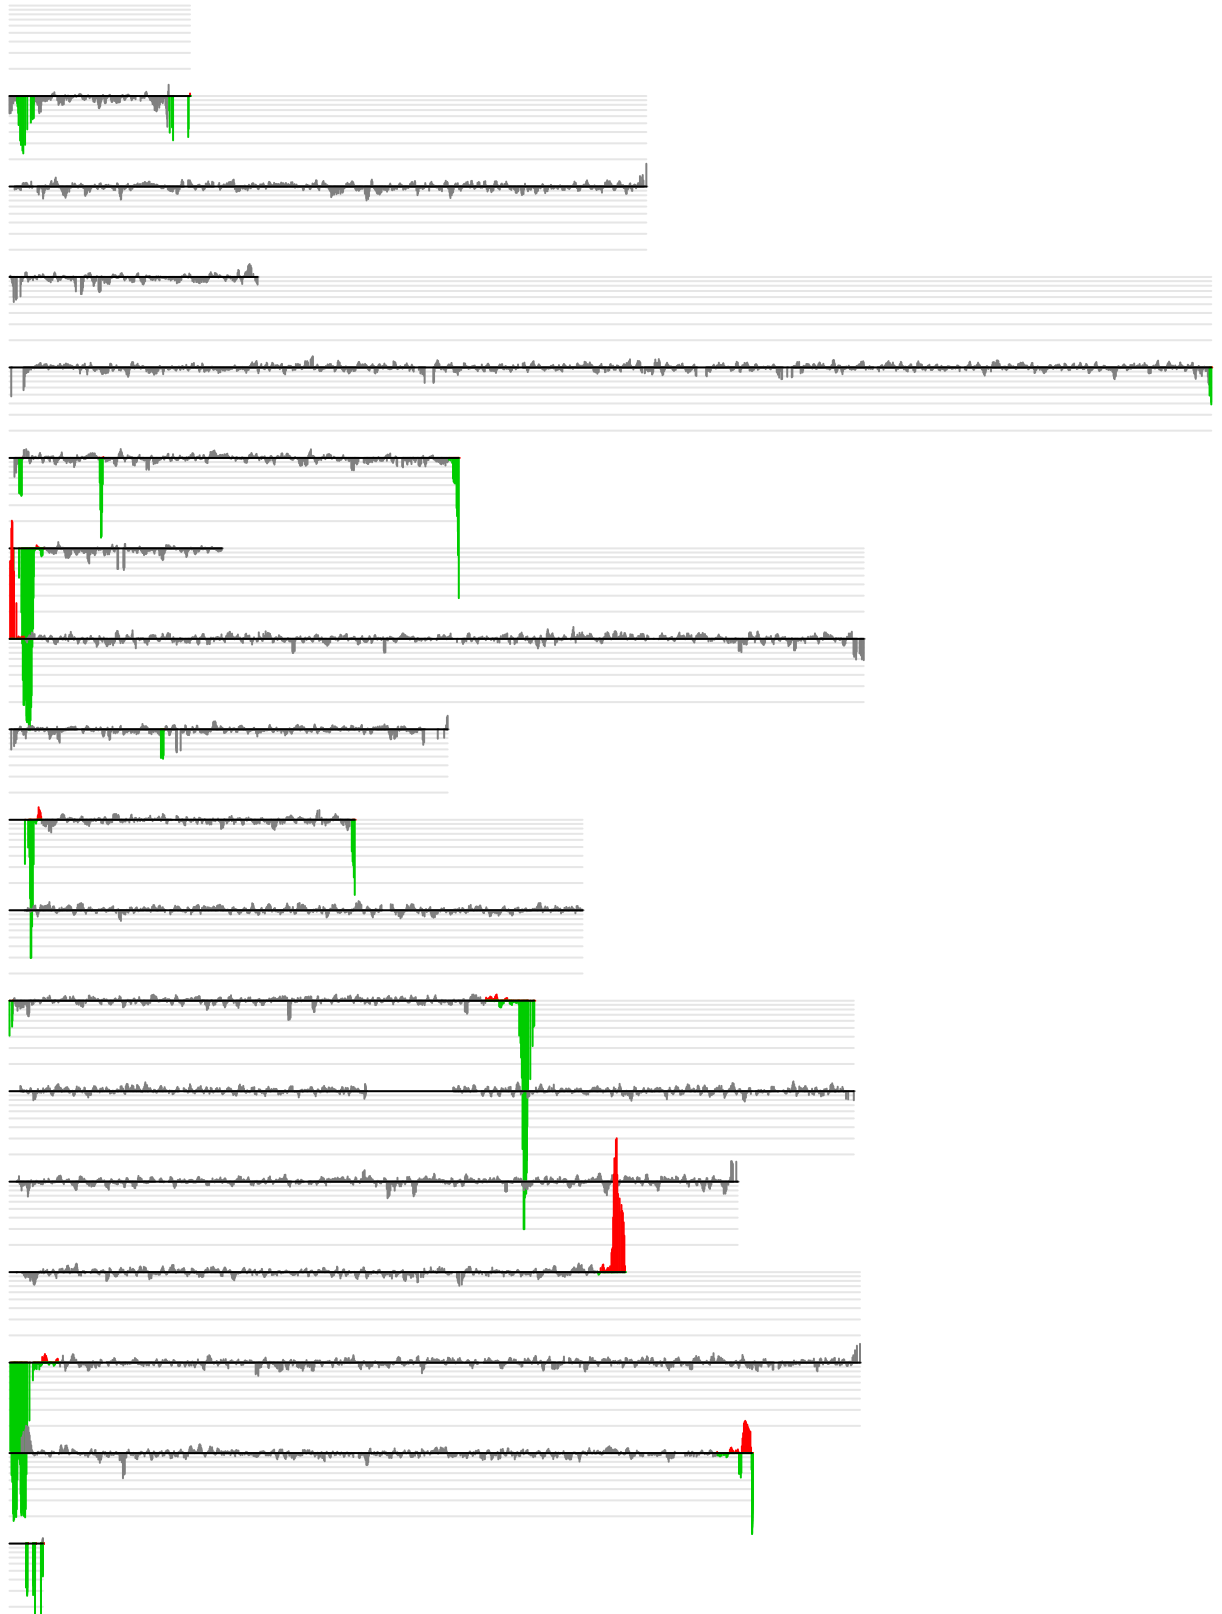



# CLAC Plot for Sample: 25 vs PSL2

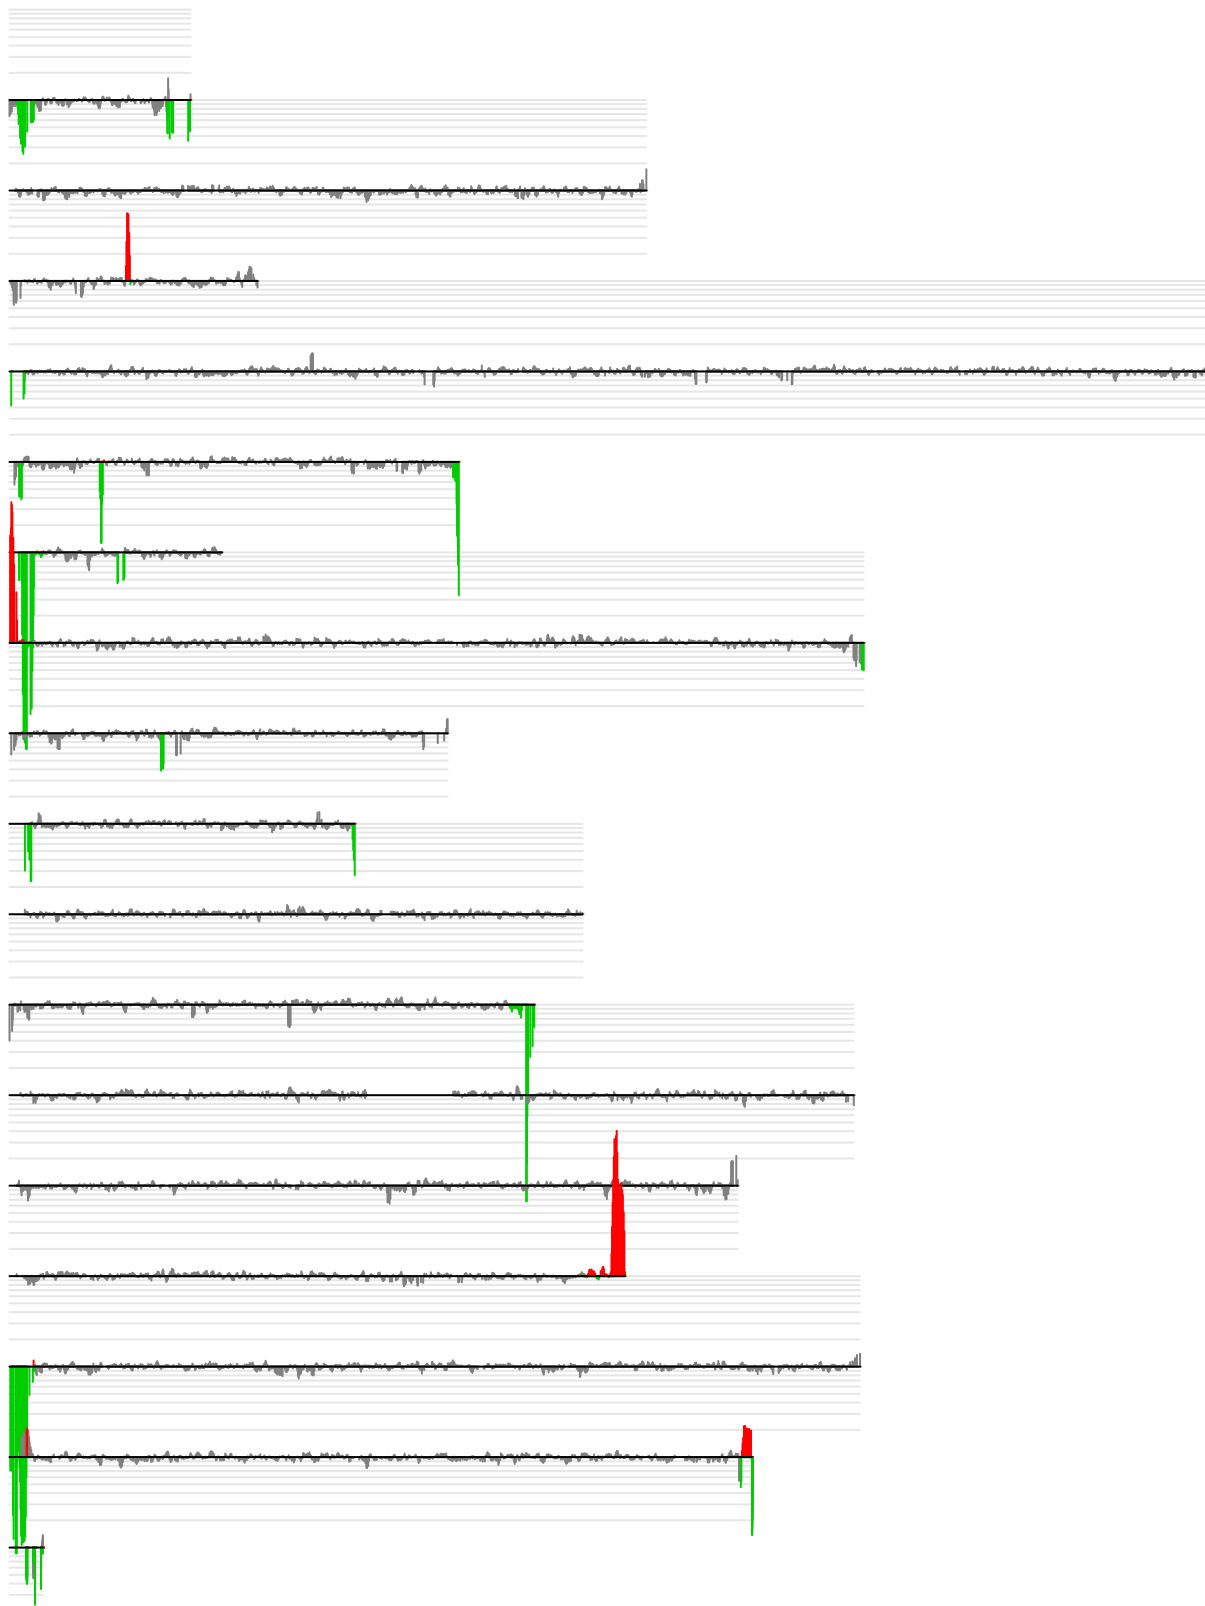



# CLAC Plot for Sample: m1 vs PSL2

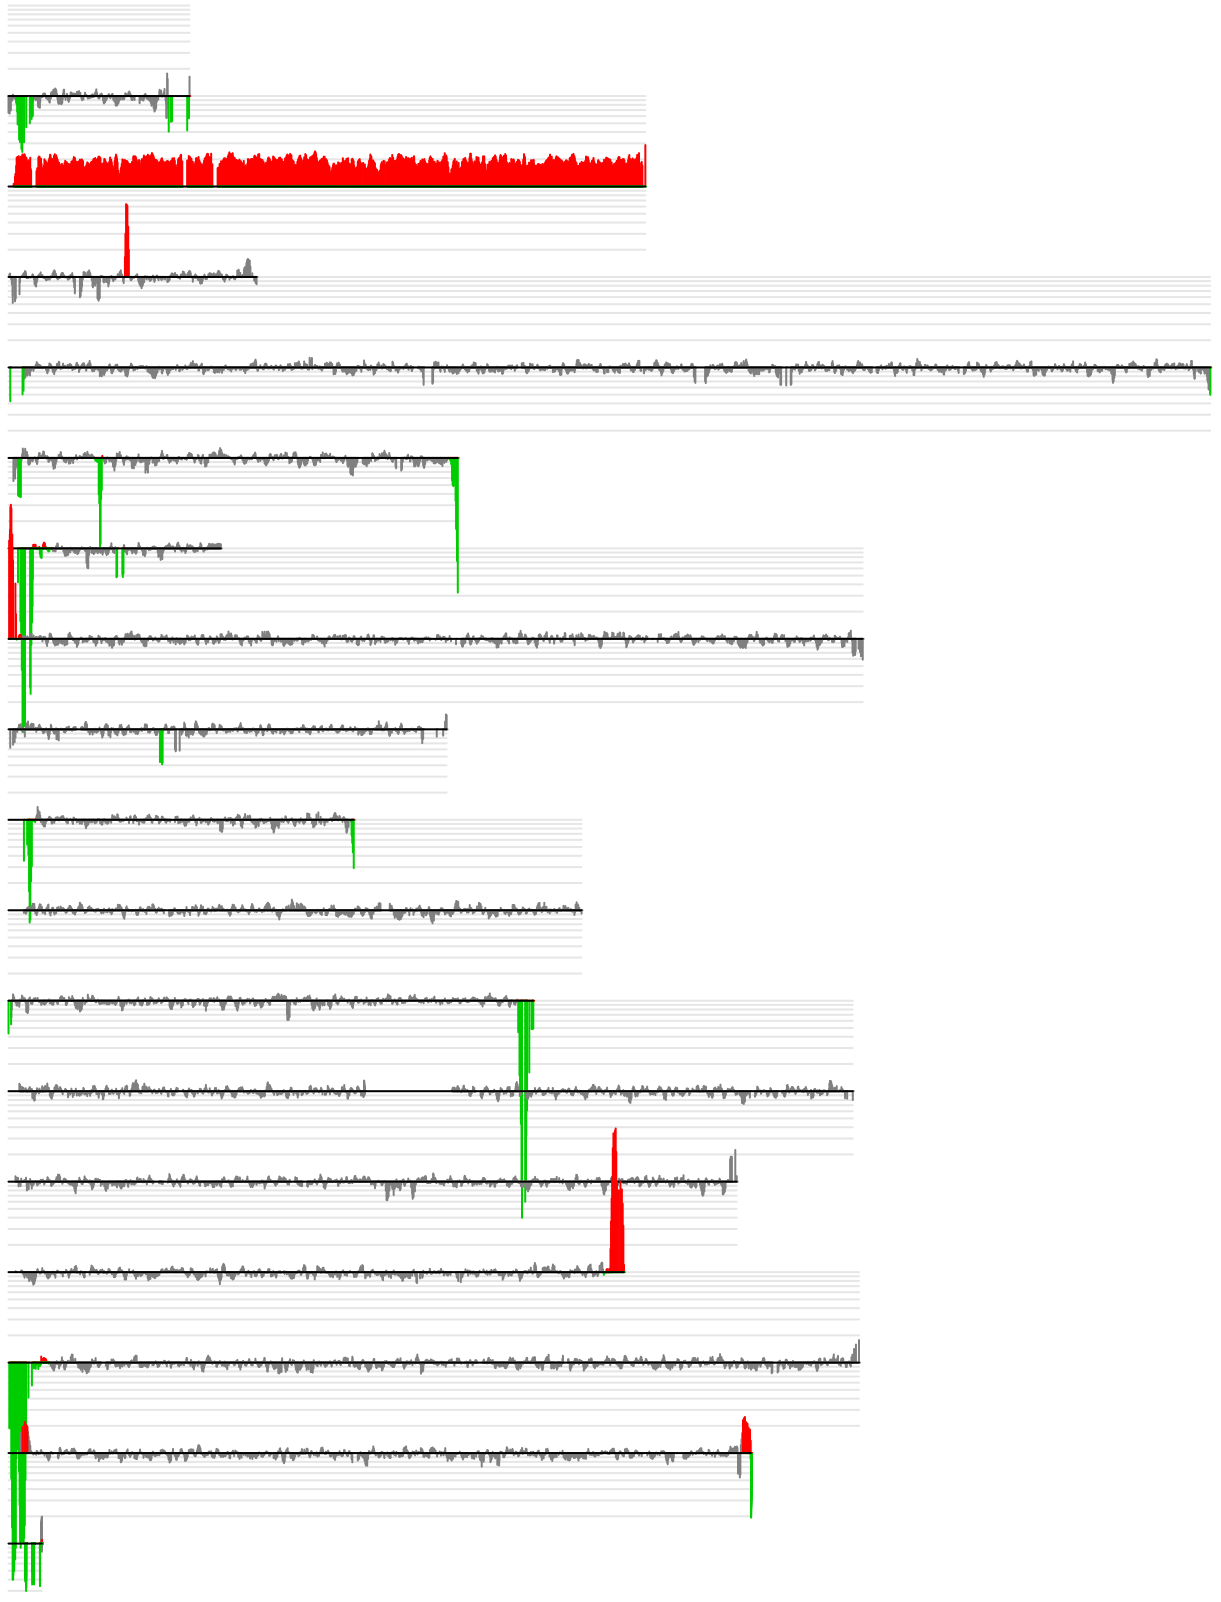

# CLAC Plot for Sample: m2 vs PLS2

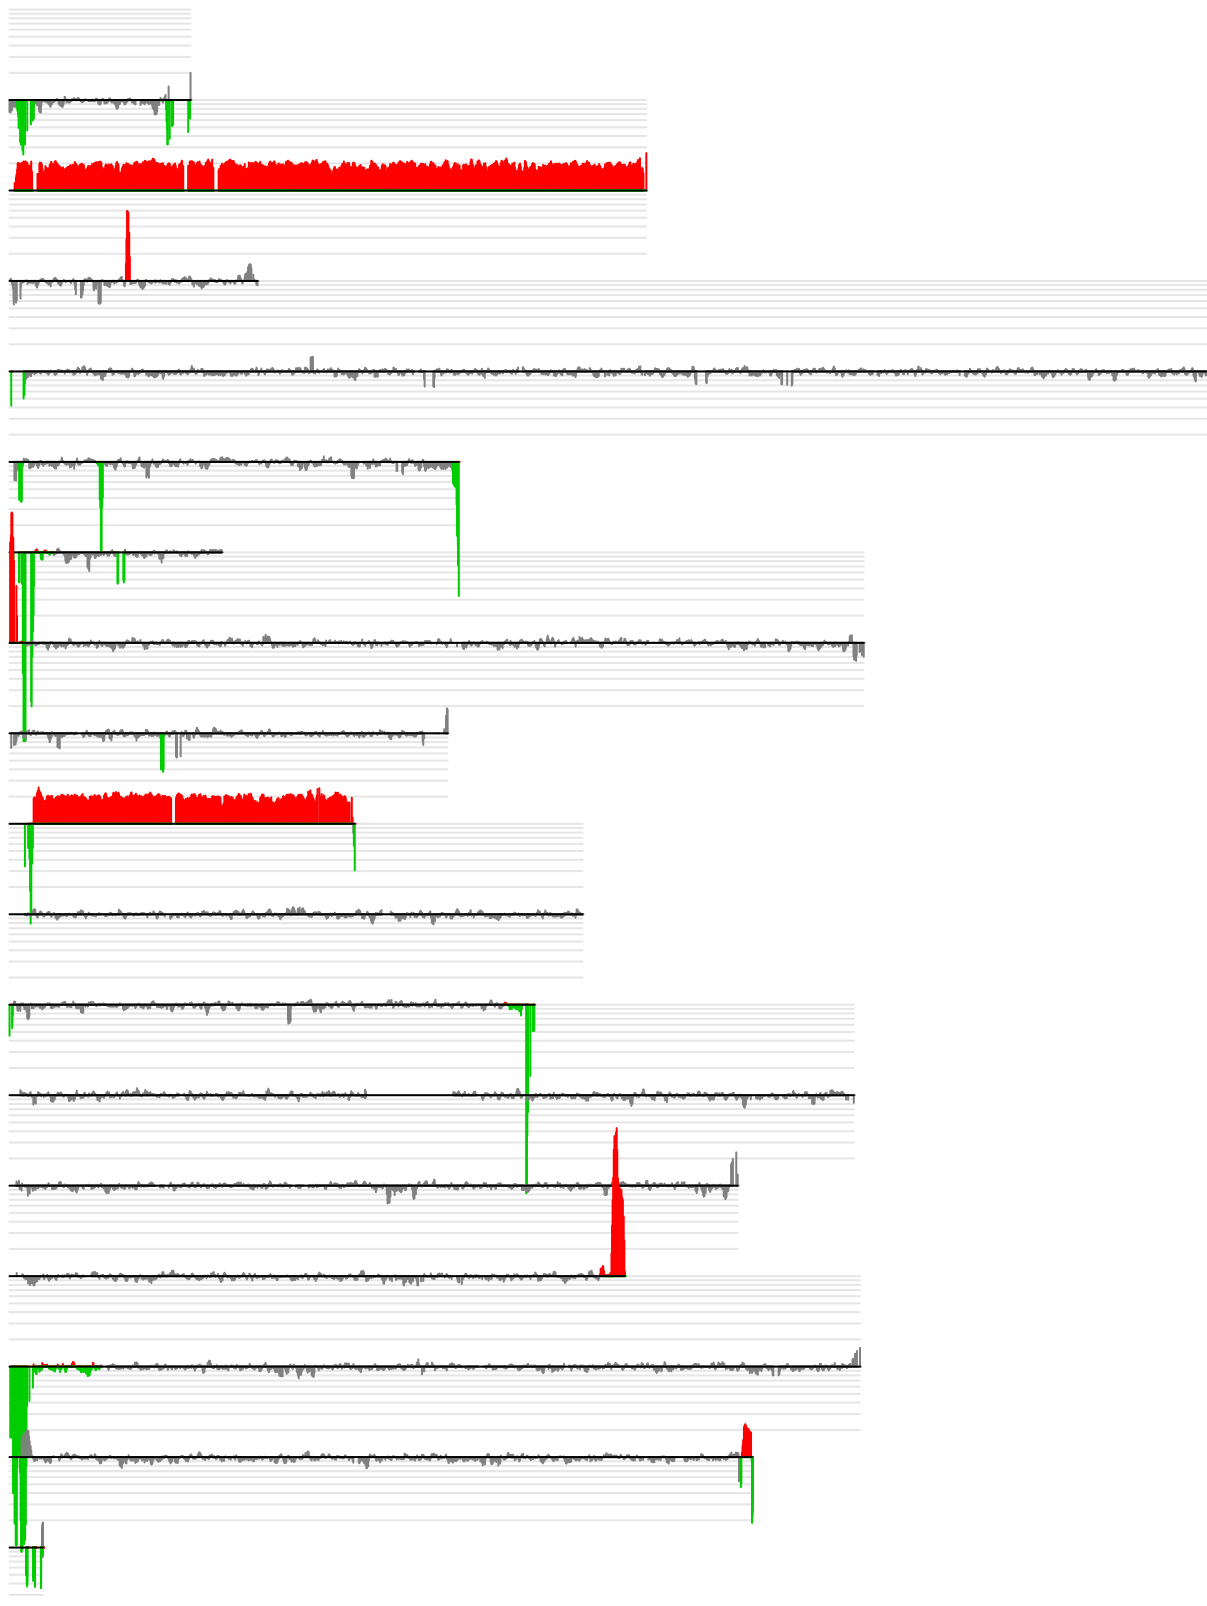





# CLAC Plot for Sample: p4 vs p1

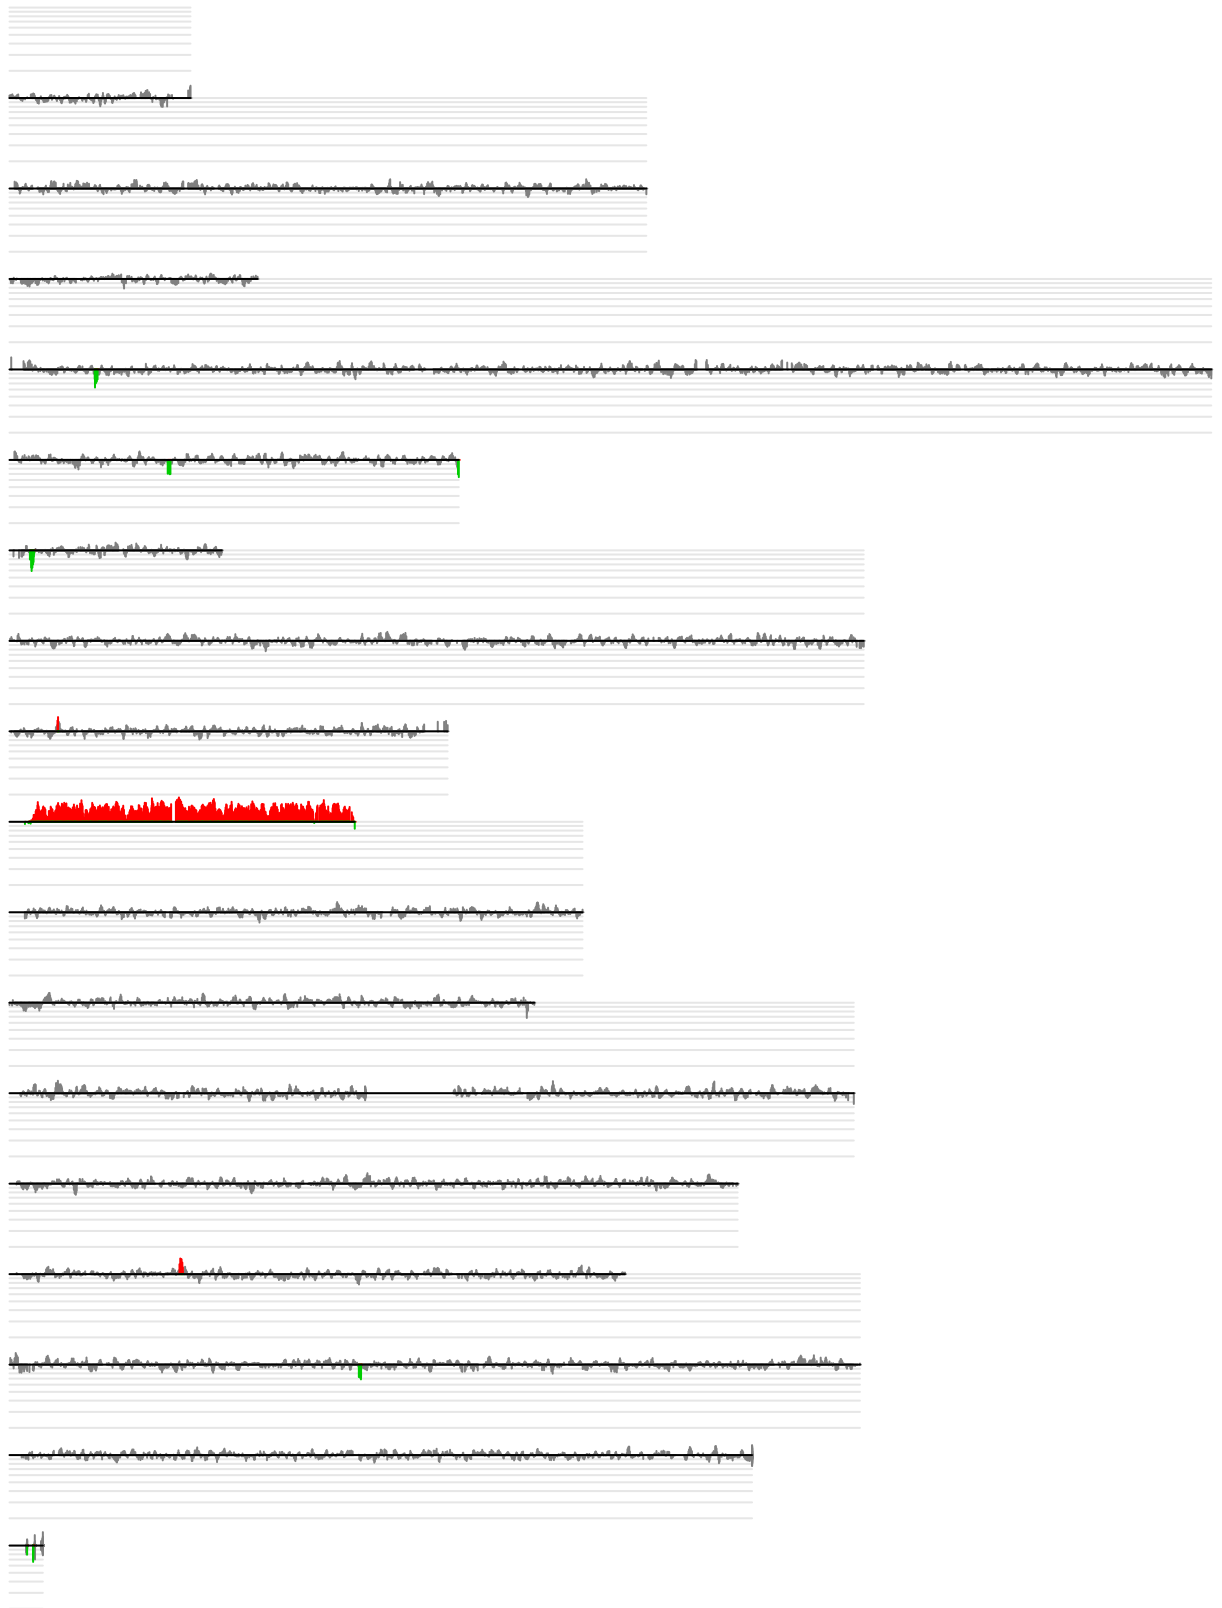

# CLAC Plot for Sample: p10 vs p1

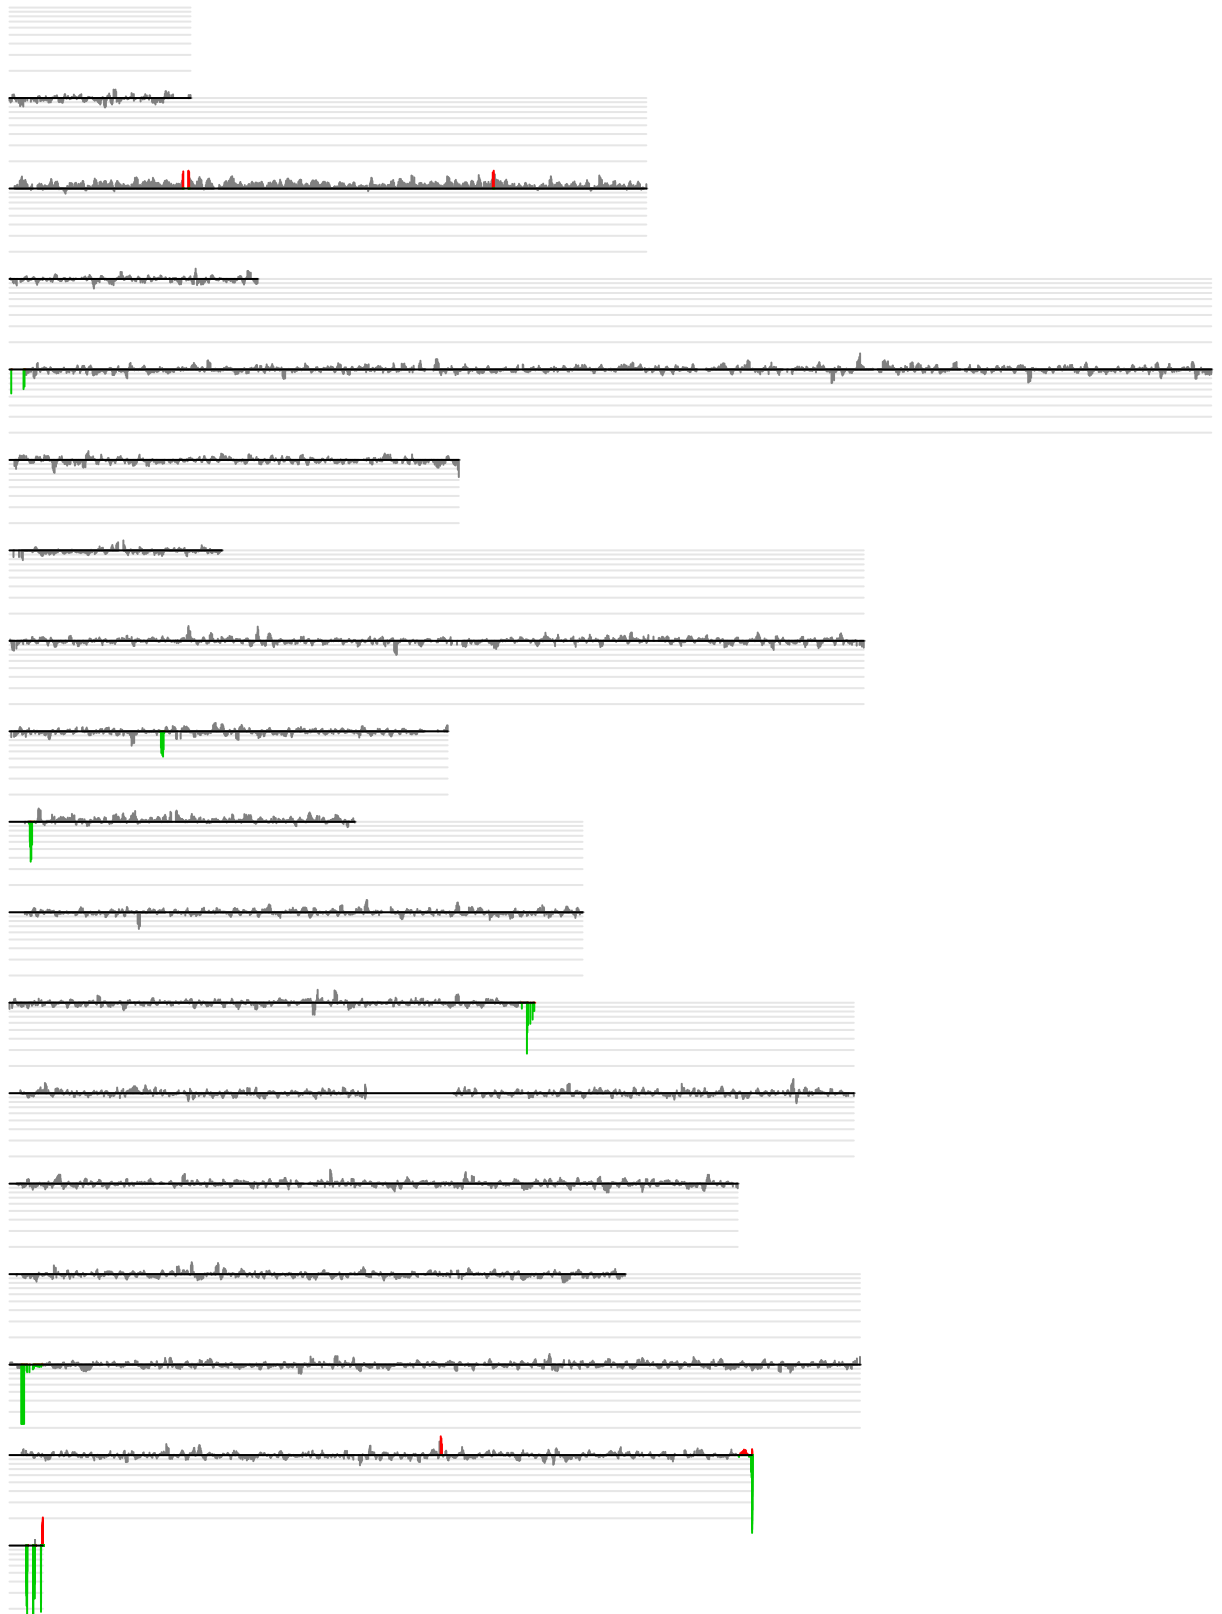

# CLAC Plot for Sample: p11 vs p1

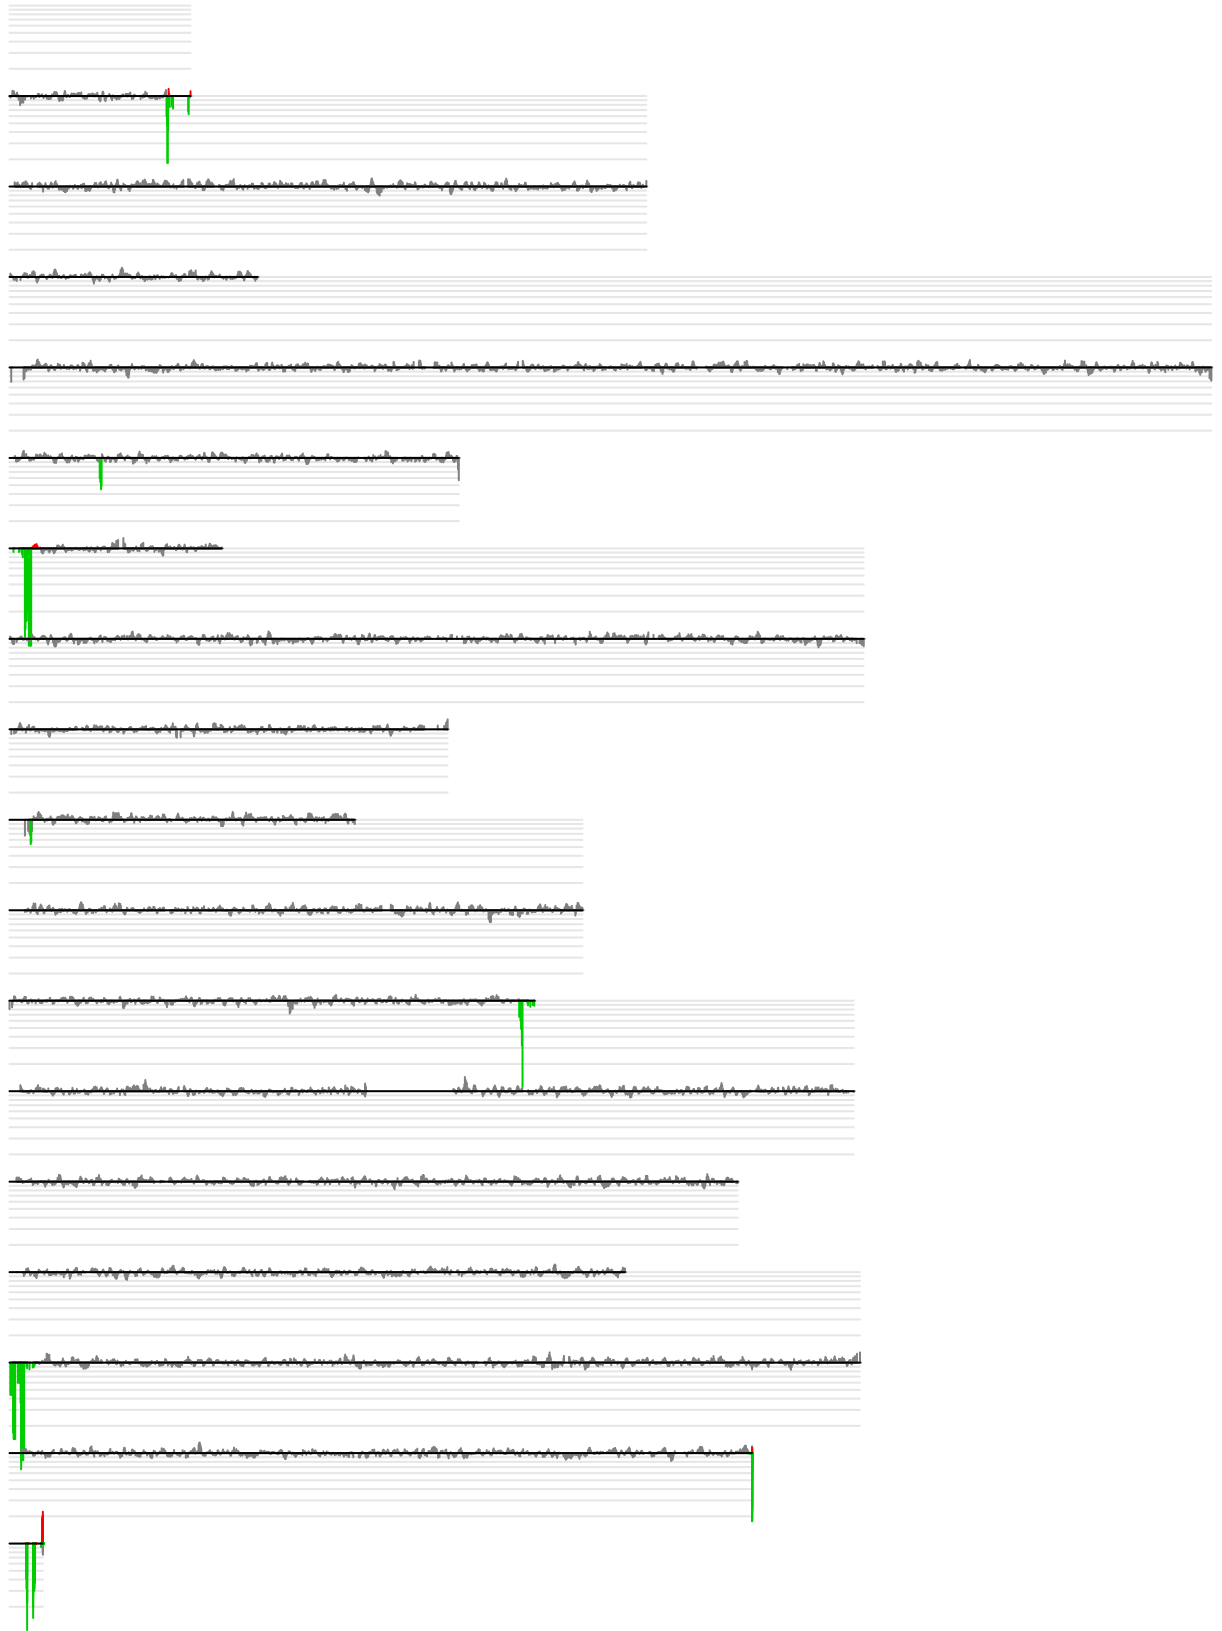

# CLAC Plot for Sample: p12 vs p1

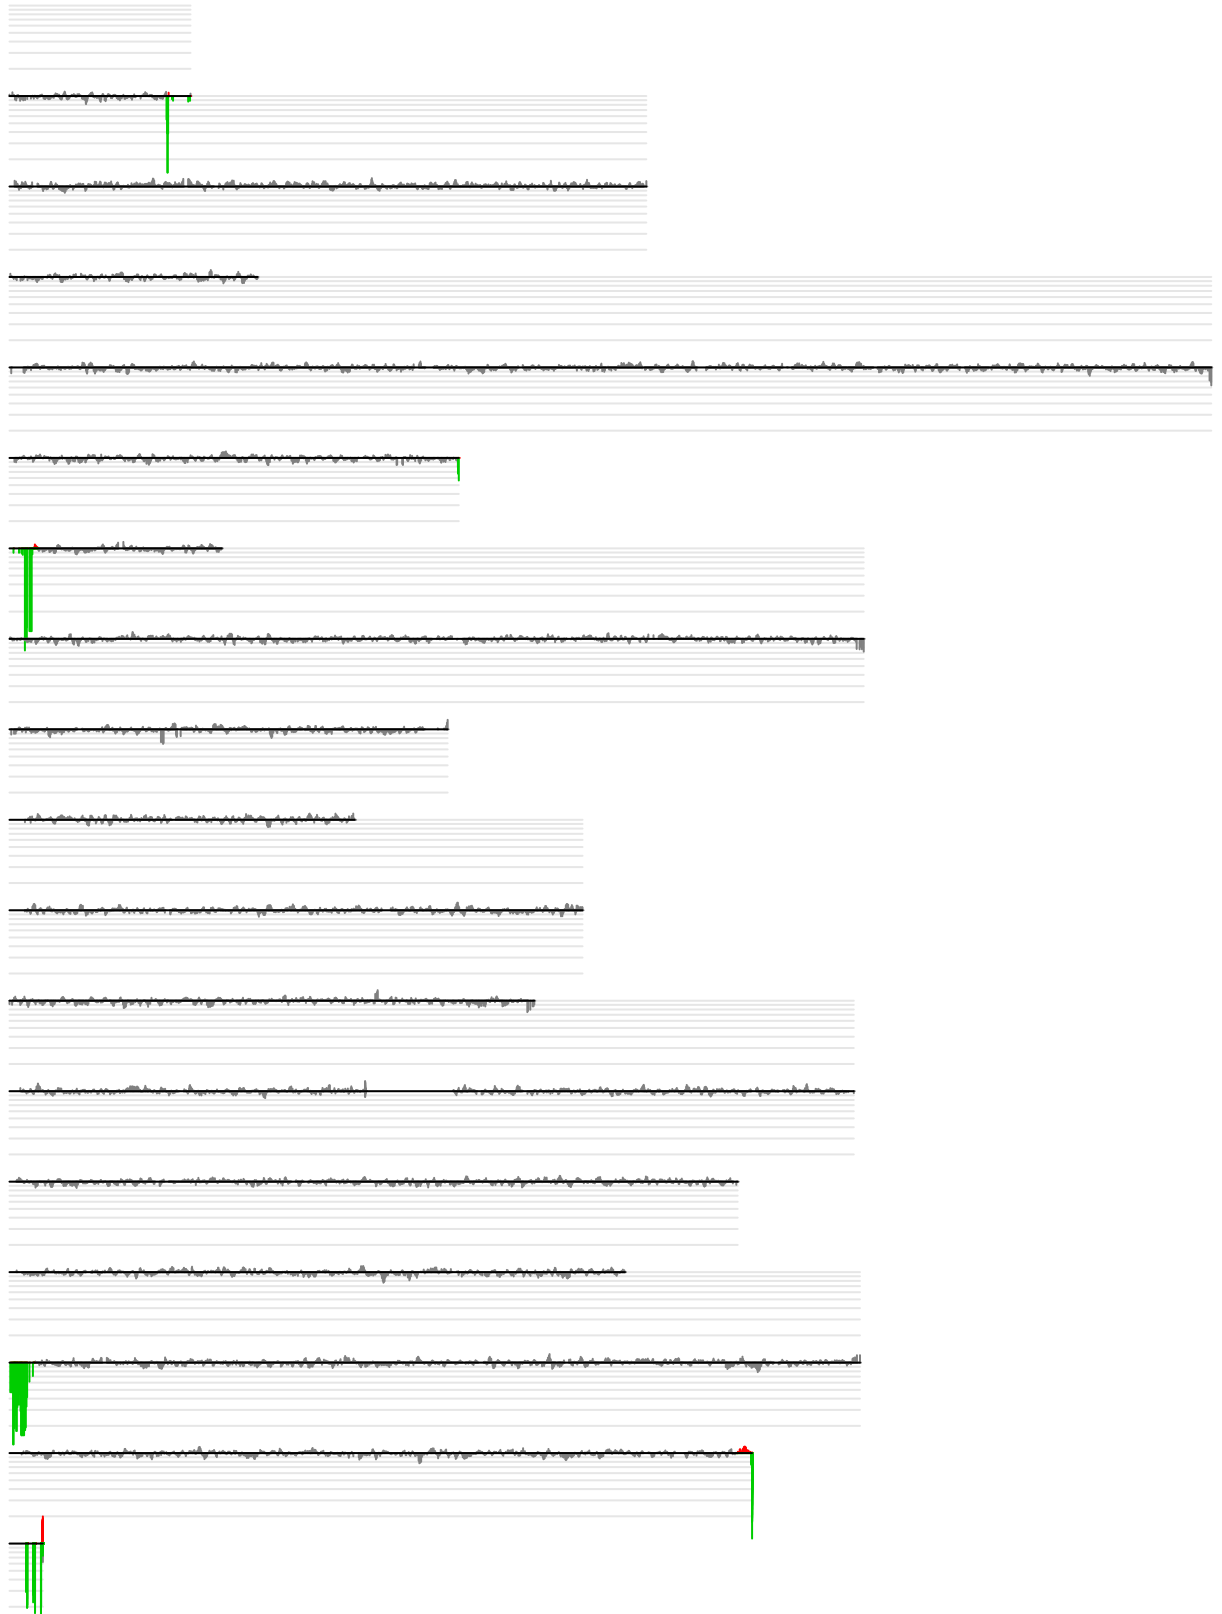



# CLAC Plot for Sample: m4 vs p1

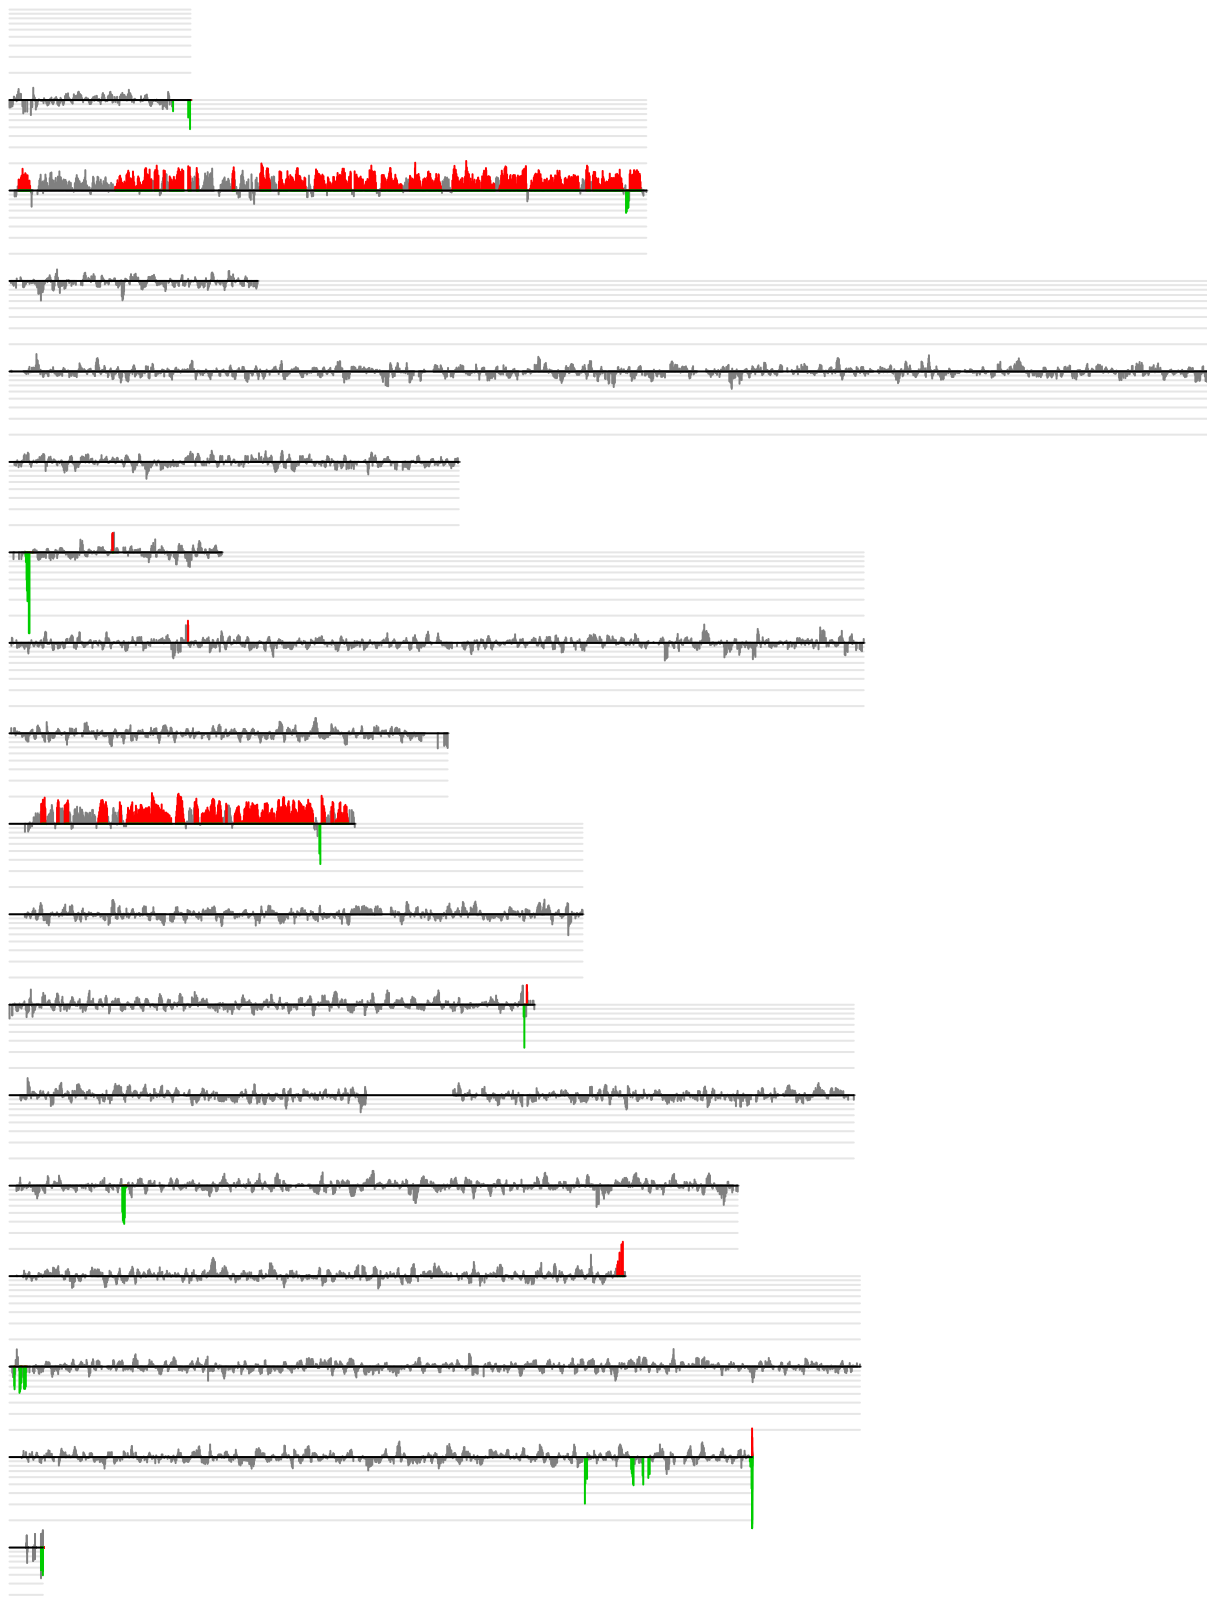

# CLAC Plot for Sample: m6 vs p1

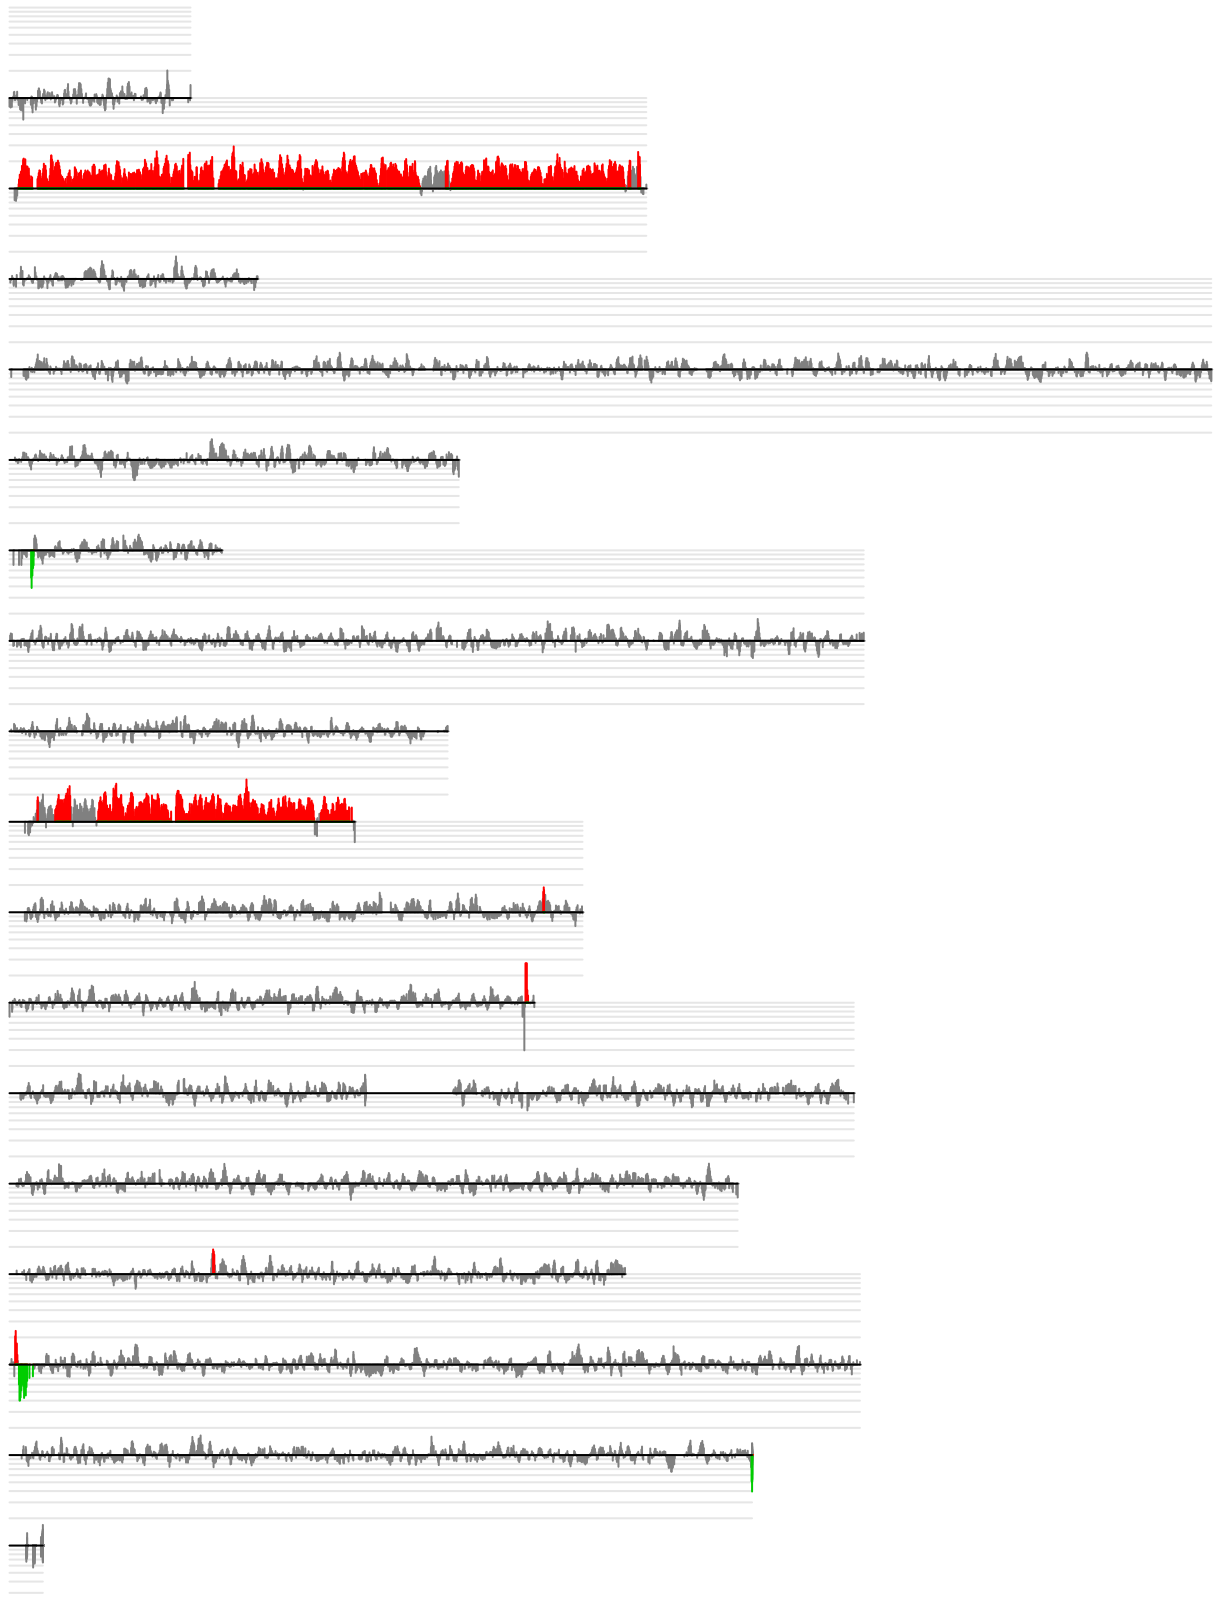

# CLAC Plot for Sample: m7 vs p1

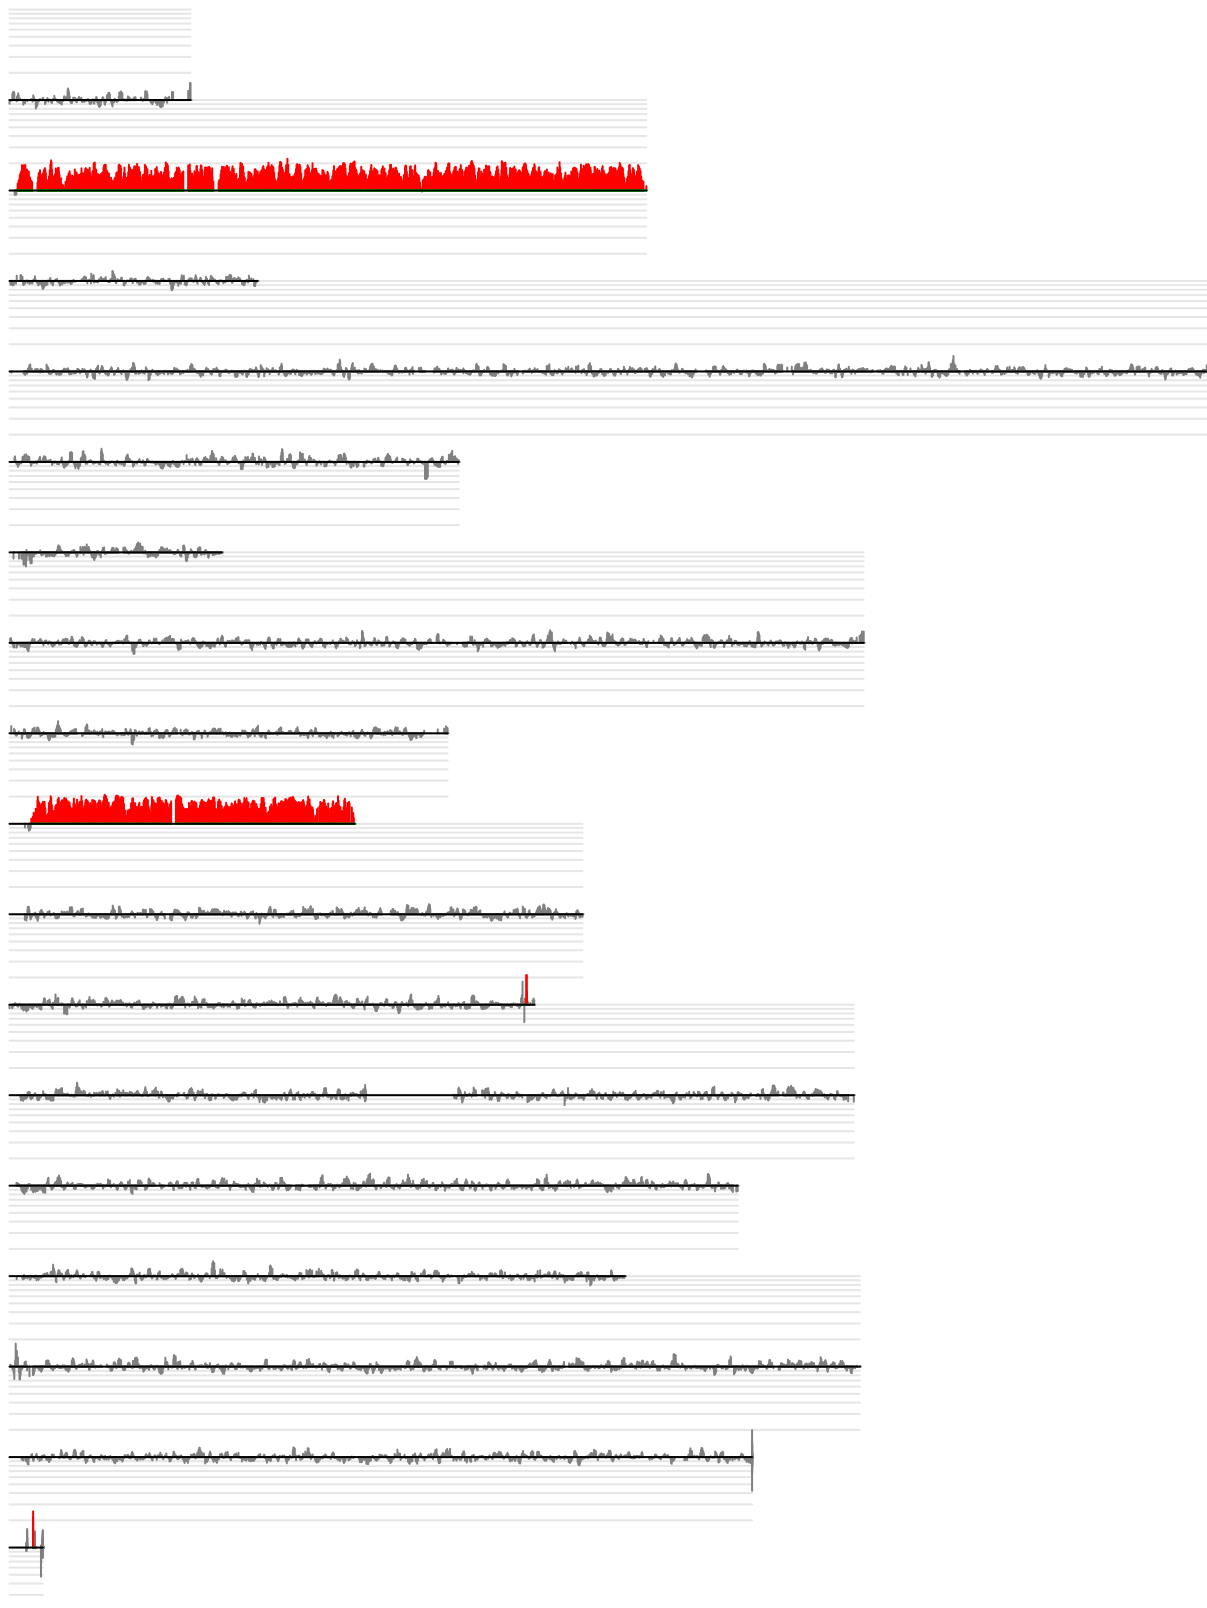



# CLAC Plot for Sample: m8 vs p1

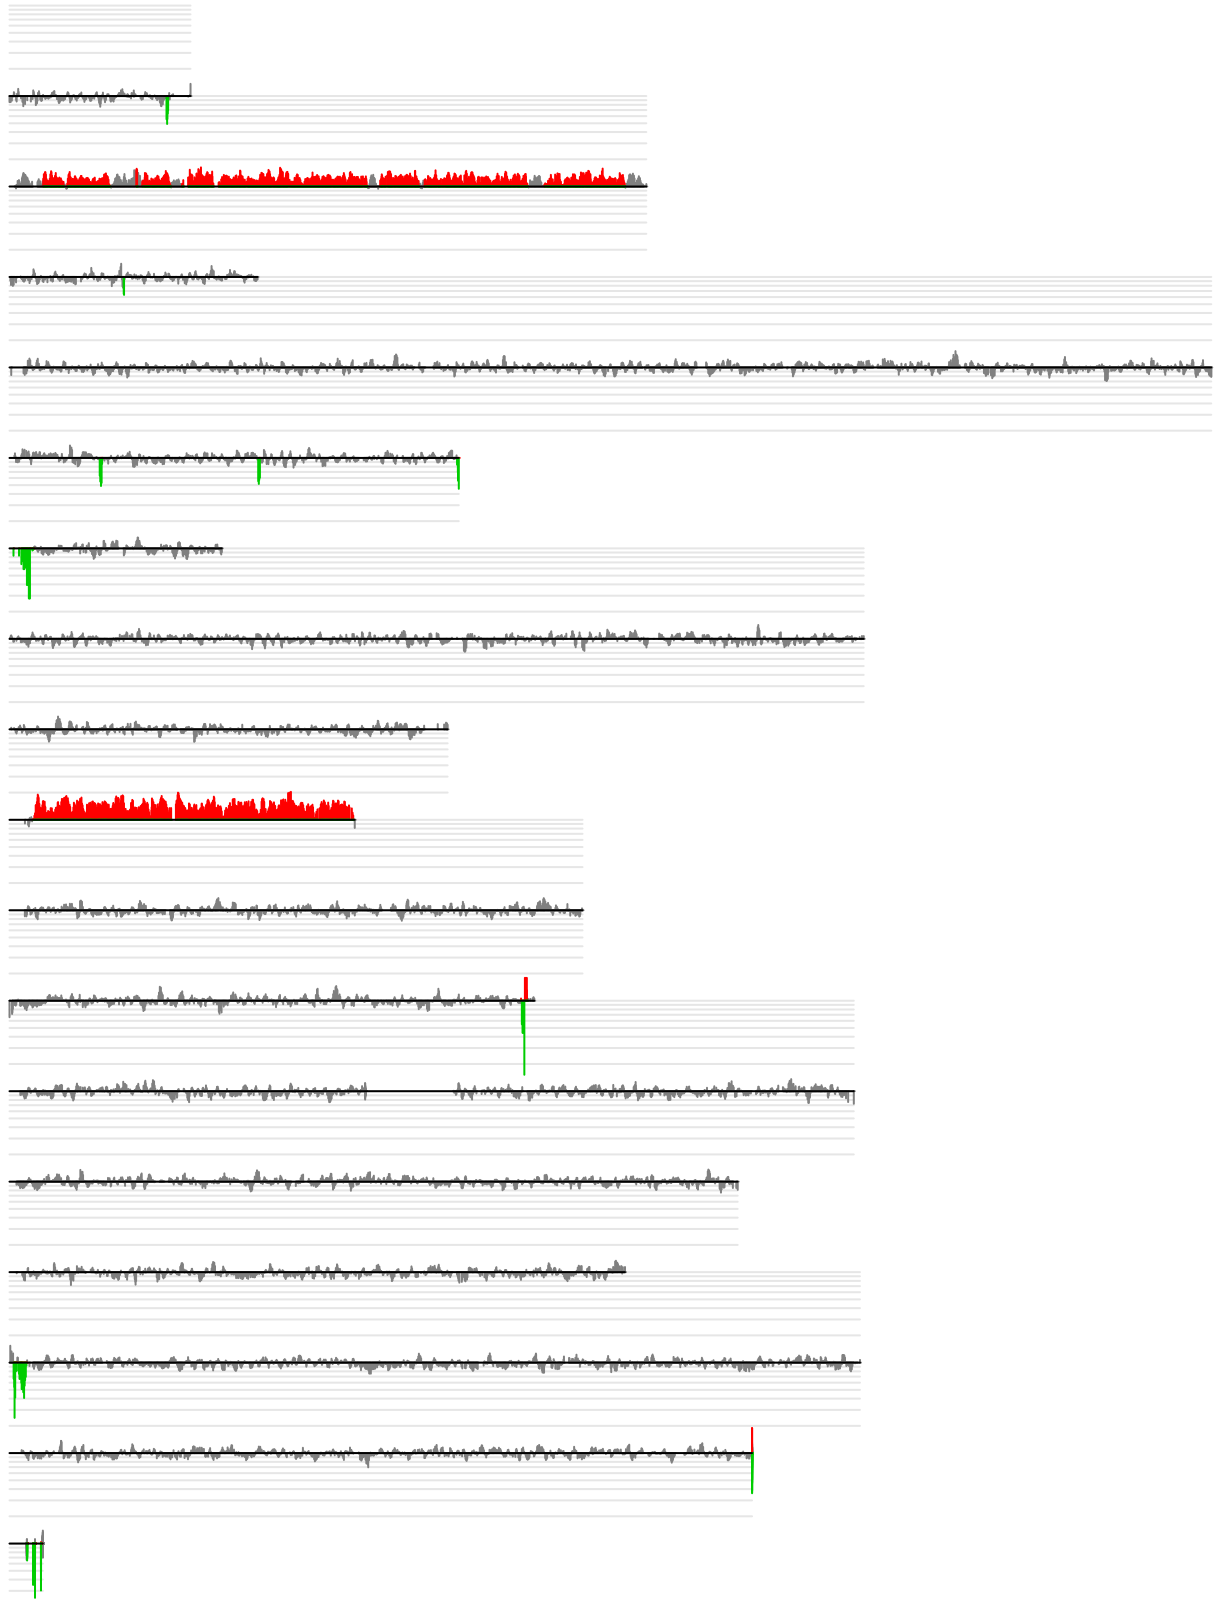

# CLAC Plot for Sample: m9 vs p1

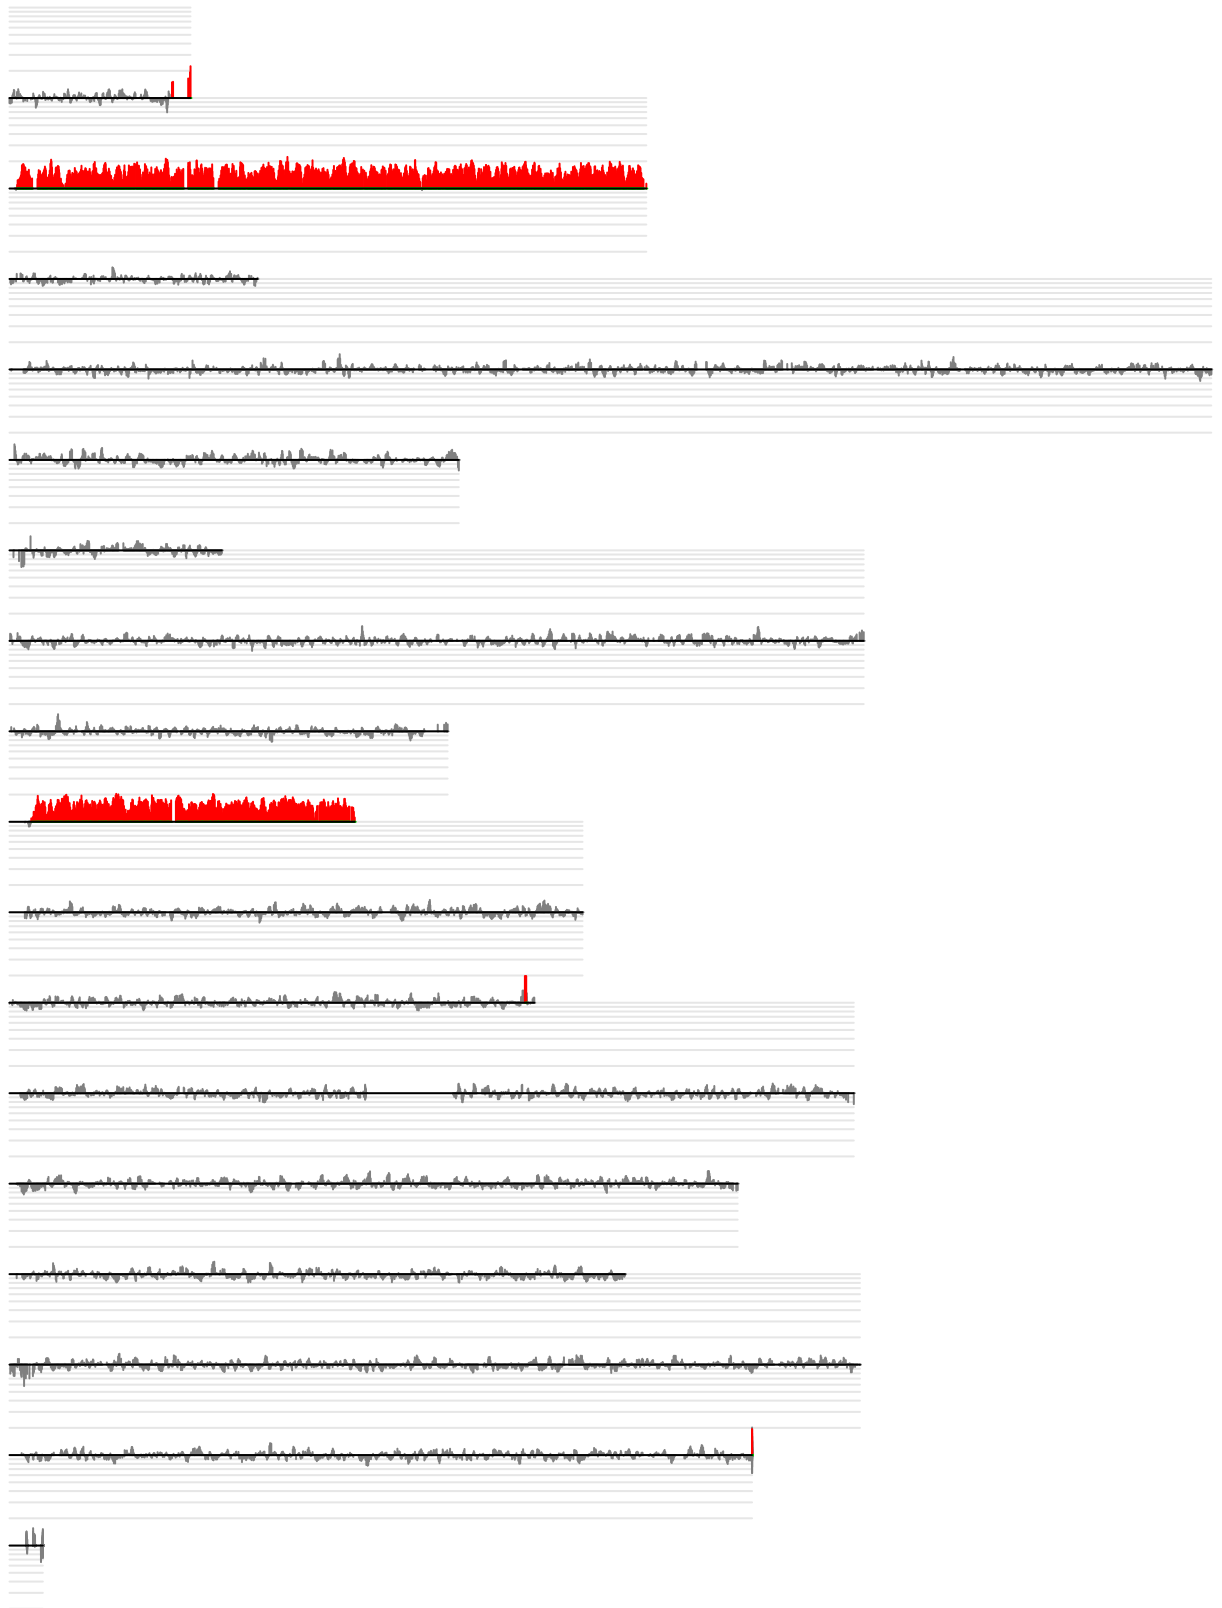

# CLAC Plot for Sample: m11 vs p1

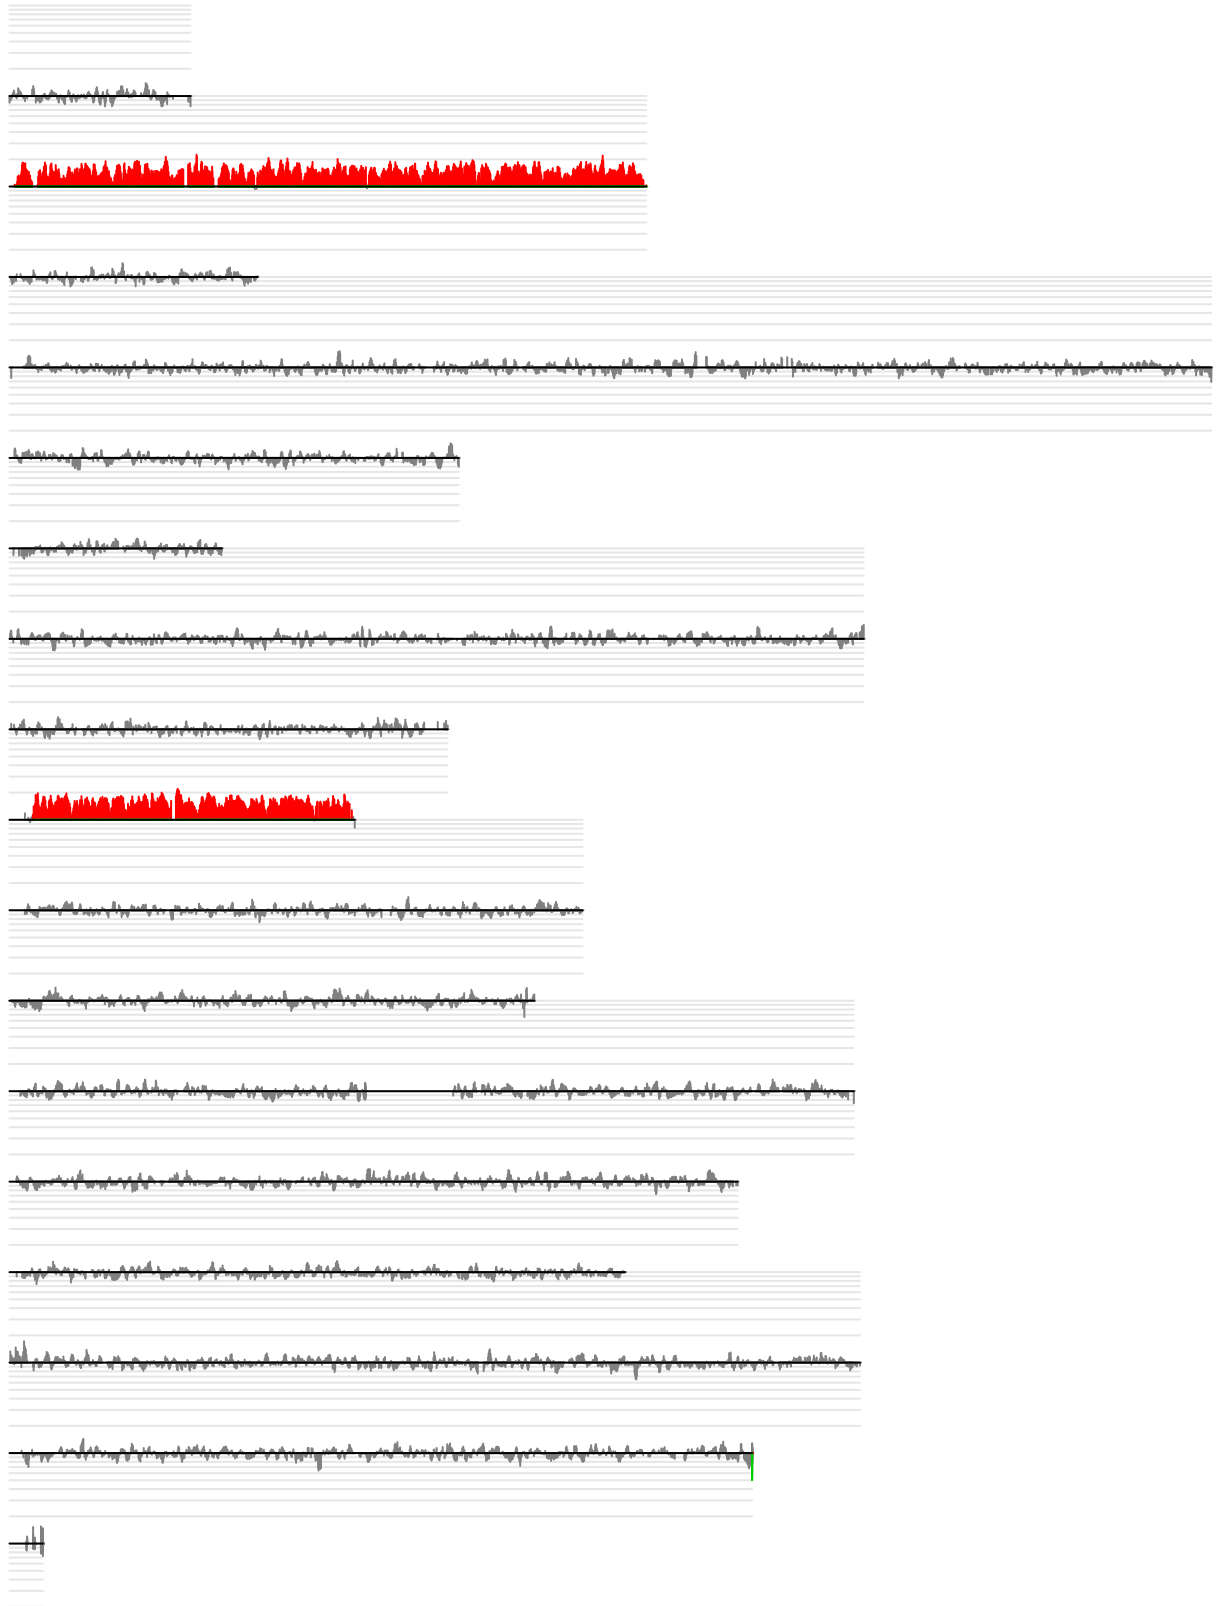

Supplement: 12863_2016_464_MOESM3_ESM.pdf [file 12863_2016_464_MOESM3_ESM.pdf]
